# Supplementary material for: Aldehyde and Volatile Organic Compound Yields in Commercial Cigarette Mainstream Smoke Are Mutually Related and Depend on the Sugar and Humectant Content in Tobacco
Source: PubMed Central journal article supplement — Nicotine Tob Res. 2019 Nov 4;22(10):1748–56. doi: 10.1093/ntr/ntz203 (PMC7542651; doi:10.1093/ntr/ntz203), 2019-11-04
Supplement: ntz203_suppl_supplementary_table_1.pdf [file ntz203_suppl_supplementary_table_1.pdf]

| Data class              | Compound         | Tobacco |         |         |                  |          |        |         |        |              |              | Smoke ISO |               |         |                         |                         |              |          |                 |          |         | Smoke INT         |         |                    |        |             |                  |                            |                              |                  |        |          |        |              |              |          |               |         |                         |                         |              |          |                 |          |         |                   |         |                    |          |             |                  |                            |                              |                  |        |        |        |
|-------------------------|------------------|---------|---------|---------|------------------|----------|--------|---------|--------|--------------|--------------|-----------|---------------|---------|-------------------------|-------------------------|--------------|----------|-----------------|----------|---------|-------------------|---------|--------------------|--------|-------------|------------------|----------------------------|------------------------------|------------------|--------|----------|--------|--------------|--------------|----------|---------------|---------|-------------------------|-------------------------|--------------|----------|-----------------|----------|---------|-------------------|---------|--------------------|----------|-------------|------------------|----------------------------|------------------------------|------------------|--------|--------|--------|
|                         |                  | benzene | toluene | styrene | propylene glycol | glycerol | tar    | benzene | CO     | formaldehyde | acetaldehyde | acrolein  | 1,3-Butadiene | benzene | 1,2,4-trimethyl-Benzene | 1,3,5-trimethyl-Benzene | ethylbenzene | m-Xylene | n-Propylbenzene | o-Xylene | styrene | tert-Butylbenzene | toluene | 2,5-dimethyl-Furan | phenol | naphthalene | sec-Butylbenzene | cis-1,3-dichloro-1-Propene | trans-1,3-dichloro-1-Propene | trichloromethane | tar    | nicotine | CO     | formaldehyde | acetaldehyde | acrolein | 1,3-Butadiene | benzene | 1,2,4-trimethyl-Benzene | 1,3,5-trimethyl-Benzene | ethylbenzene | m-Xylene | n-Propylbenzene | o-Xylene | styrene | tert-Butylbenzene | toluene | 2,5-dimethyl-Furan | isoprene | naphthalene | sec-Butylbenzene | cis-1,3-dichloro-1-Propene | trans-1,3-dichloro-1-Propene | trichloromethane |        |        |        |
| Tobacco                 | Sucrose          | 1.000   | 0.290   | -0.158  | 0.328            | 0.023    | 0.454  | 0.206   | 0.197  | 0.244        | 0.157        | 0.171     | 0.249         | 0.191   | 0.210                   | 0.163                   | 0.194        | 0.222    | 0.188           | 0.181    | 0.194   | 0.280             | 0.166   | 0.214              | 0.250  | 0.122       | 0.099            | 0.004                      | -0.097                       | -0.252           | 0.075  | -0.148   | 0.377  | 0.117        | 0.205        | 0.606    | 0.373         | 0.348   | 0.174                   | 0.118                   | 0.073        | 0.064    | 0.159           | 0.012    | 0.087   | 0.076             | 0.256   | -0.035             | 0.103    | 0.145       | 0.009            | -0.087                     | -0.017                       | 0.259            | 0.119  | -0.049 | -0.153 |
|                         | Glucose          | 0.290   | 1.000   | 0.890   | 0.996            | -0.292   | -0.157 | -0.078  | 0.076  | -0.072       | -0.213       | -0.060    | -0.063        | 0.000   | 0.043                   | 0.066                   | 0.067        | 0.059    | 0.107           | 0.108    | 0.105   | 0.085             | 0.021   | 0.210              | 0.122  | 0.036       | 0.074            | -0.246                     | -0.336                       | -0.082           | -0.149 | -0.077   | 0.160  | -0.223       | 0.600        | -0.124   | -0.084        | -0.148  | -0.128                  | -0.023                  | 0.069        | -0.062   | 0.135           | -0.005   | 0.133   | -0.028            | 0.357   | -0.182             | -0.611   | -0.073      | -0.214           | -0.174                     | -0.200                       | -0.100           | -0.330 | -0.361 |        |
|                         | Fructose         | -0.158  | 0.890   | 1.000   | 0.863            | -0.292   | -0.364 | -0.192  | -0.014 | -0.196       | -0.293       | -0.131    | -0.167        | -0.089  | -0.051                  | 0.021                   | -0.023       | -0.046   | 0.026           | -0.059   | -0.001  | -0.114            | 0.141   | -0.088             | 0.327  | 0.190       | -0.090           | 0.062                      | -0.261                       | -0.246           | -0.120 | -0.098   | -0.266 | 0.118        | -0.315       | 0.110    | -0.264        | -0.216  | -0.188                  | -0.143                  | -0.071       | 0.228    | -0.091          | 0.188    | 0.004   | 0.154             | -0.112  | 0.406              | -0.191   | 0.603       | 0.108            | -0.202                     | -0.169                       | -0.351           | -0.181 | 0.006  | -0.269 |
|                         | Sugars total     | 0.355   | 0.996   | 0.863   | 1.000            | -0.278   | -0.120 | -0.068  | 0.089  | -0.057       | -0.198       | -0.044    | -0.040        | 0.013   | 0.057                   | 0.085                   | 0.078        | -0.072   | 0.119           | 0.037    | 0.097   | 0.037             | 0.218   | 0.026              | 0.433  | 0.236       | -0.031           | 0.068                      | -0.267                       | -0.352           | -0.075 | -0.186   | -0.051 | 0.169        | -0.199       | 0.401    | -0.083        | -0.048  | -0.117                  | -0.102                  | -0.023       | 0.224    | -0.033          | 0.152    | 0.019   | 0.154             | 0.003   | 0.355              | -0.155   | 0.623       | 0.086            | -0.224                     | -0.171                       | -0.187           | -0.098 | -0.028 | -0.353 |
|                         | Propylene glycol | 0.023   | -0.292  | -0.292  | -0.278           | 1.000    | 0.014  | 0.147   | 0.080  | 0.176        | -0.059       | 0.144     | 0.190         | 0.107   | 0.108                   | 0.076                   | 0.014        | 0.049    | 0.023           | -0.051   | 0.016   | 0.058             | -0.055  | 0.111              | -0.015 | -0.042      | -0.001           | -0.124                     | 0.098                        | -0.149           | -0.056 | 0.118    | 0.101  | -0.024       | 0.193        | 0.055    | 0.086         | 0.332   | 0.168                   | 0.208                   | 0.326        | 0.021    | 0.206           | 0.050    | 0.154   | 0.061             | 0.255   | -0.207             | 0.226    | -0.048      | -0.066           | 0.189                      | 0.357                        | 0.440            | -0.127 | 0.062  | -0.033 |
|                         | Glycerol         | 0.454   | -0.157  | -0.364  | -0.120           | 0.014    | 1.000  | 0.153   | 0.164  | 0.149        | -0.160       | 0.106     | 0.141         | 0.029   | 0.064                   | 0.121                   | 0.176        | 0.130    | 0.122           | 0.170    | 0.109   | 0.166             | 0.066   | 0.227              | 0.105  | -0.008      | 0.015            | -0.169                     | 0.127                        | 0.132            | -0.148 | 0.102    | -0.083 | -0.046       | 0.346        | 0.331    | 0.293         | 0.017   | -0.012                  | 0.041                   | 0.116        | 0.084    | -0.002          | 0.020    | 0.011   | 0.174             | 0.089   | 0.044              | -0.215   | 0.012       | -0.022           | 0.071                      | 0.099                        | -0.148           | -0.200 | -0.096 |        |
|                         | tar              | 0.206   | -0.078  | -0.192  | -0.068           | 0.147    | 0.153  | 1.000   | 0.858  | 0.930        | 0.649        | 0.707     | 0.730         | 0.877   | 0.840                   | 0.625                   | 0.843        | 0.874    | 0.844           | 0.794    | 0.860   | 0.833             | 0.672   | 0.870              | 0.724  | 0.741       | 0.648            | 0.155                      | 0.567                        | 0.112            | 0.358  | -0.014   | 0.551  | 0.525        | -0.132       | 0.394    | -0.054        | 0.047   | -0.112                  | -0.084                  | 0.180        | 0.125    | -0.031          | -0.054   | 0.024   | 0.012             | 0.129   | 0.004              | -0.053   | -0.038      | -0.389           | 0.474                      | 0.371                        | 0.649            | 0.043  | -0.346 | -0.105 |
|                         | Nicotine         | 0.197   | 0.076   | -0.014  | 0.089            | 0.080    | 0.164  | 0.858   | 1.000  | 0.853        | 0.548        | 0.713     | 0.707         | 0.820   | 0.796                   | 0.714                   | 0.810        | 0.837    | 0.820           | 0.746    | 0.831   | 0.809             | 0.726   | 0.828              | 0.751  | 0.763       | 0.598            | 0.398                      | 0.477                        | 0.566            | -0.213 | 0.462    | -0.036 | 0.010        | -0.104       | -0.081   | 0.117         | 0.201   | 0.033                   | 0.027                   | 0.045        | 0.056    | 0.163           | 0.073    | -0.054  | 0.649             | -0.281  | 0.339              | 0.237    | 0.534       | -0.083           | -0.313                     | -0.208                       |                  |        |        |        |
|                         | CO               | 0.244   | -0.072  | -0.196  | -0.057           | 0.176    | 0.149  | 0.930   | 0.853  | 1.000        | 0.542        | 0.658     | 0.678         | 0.892   | 0.876                   | 0.606                   | 0.807        | 0.860    | 0.834           | 0.738    | 0.808   | 0.808             | 0.674   | 0.886              | 0.751  | 0.752       | 0.642            | 0.601                      | 0.372                        | 0.017            | 0.340  | 0.034    | 0.580  | 0.512        | -0.018       | 0.394    | 0.035         | 0.166   | 0.004                   | 0.091                   | 0.107        | 0.195    | 0.127           | 0.073    | 0.140   | 0.125             | 0.244   | 0.074              | 0.108    | 0.049       | -0.246           | 0.215                      | 0.276                        | 0.549            | 0.096  | -0.331 | -0.133 |
|                         | Formaldehyde     | 0.157   | -0.213  | -0.293  | -0.198           | -0.059   | 0.160  | 0.649   | 0.548  | 0.542        | 1.000        | 0.607     | 0.620         | 0.654   | 0.528                   | 0.396                   | 0.540        | 0.620    | 0.546           | 0.565    | 0.580   | 0.653             | 0.336   | 0.549              | 0.349  | 0.487       | 0.547            | 0.254                      | 0.576                        | 0.193            | 0.150  | -0.073   | 0.435  | 0.356        | -0.033       | 0.307    | 0.072         | 0.001   | -0.153                  | -0.199                  | -0.037       | -0.071   | -0.134          | -0.223   | -0.112  | -0.149            | 0.039   | -0.207             | -0.169   | -0.289      | -0.370           | 0.410                      | 0.226                        | 0.528            | 0.189  | -0.076 | 0.432  |
| Acetaldehyde            | 0.171            | -0.060  | -0.131  | -0.044  | 0.144            | 0.106    | 0.707  | 0.713   | 0.658  | 0.607        | 1.000        | 0.968     | 0.767         | 0.783   | 0.669                   | 0.722                   | 0.756        | 0.720    | 0.687           | 0.737    | 0.809   | 0.511             | 0.727   | 0.557              | 0.670  | 0.646       | 0.153            | 0.395                      | -0.137                       | 0.131            | -0.025 | 0.164    | 0.319  | -0.312       | 0.594        | 0.163    | 0.150         | 0.011   | 0.010                   | 0.369                   | 0.325        | 0.139    | 0.120           | 0.187    | 0.199   | 0.409             | 0.000   | 0.045              | -0.028   | -0.216      | 0.431            | 0.384                      | 0.594                        | -0.369           | -0.304 | -0.186 |        |
| Acrolein                | 0.249            | -0.063  | -0.167  | -0.040  | 0.190            | 0.141    | 0.730  | 0.707   | 0.678  | 0.620        | 0.968        | 1.000     | 0.781         | 0.698   | 0.675                   | 0.720                   | 0.758        | 0.716    | 0.679           | 0.736    | 0.818   | 0.488             | 0.718   | 0.550              | 0.679  | 0.652       | 0.189            | 0.435                      | -0.089                       | 0.067            | -0.054 | 0.259    | 0.372  | -0.224       | 0.605        | 0.152    | 0.199         | 0.300   | 0.023                   | 0.439                   | 0.299        | 0.144    | 0.115           | 0.181    | 0.192   | 0.395             | -0.008  | 0.046              | 0.003    | -0.224      | 0.459            | 0.421                      | 0.660                        | -0.298           | -0.234 | -0.149 |        |
| 1,3-Butadiene           | 0.191            | 0.000   | -0.089  | 0.013   | 0.107            | 0.029    | 0.877  | 0.820   | 0.892  | 0.654        | 0.781        | 1.000     | 0.910         | 0.664   | 0.857                   | 0.909                   | 0.876        | 0.716    | 0.619           | 0.886    | 0.859   | 0.655             | 0.900   | 0.786              | 0.851  | 0.737       | 0.142            | 0.468                      | 0.074                        | 0.259            | -0.009 | 0.494    | 0.541  | -0.054       | 0.436        | 0.012    | 0.130         | 0.019   | -0.001                  | 0.170                   | 0.157        | 0.034    | 0.042           | 0.096    | 0.105   | 0.145             | 0.028   | -0.003             | 0.667    | 0.053       | -0.200           | -0.028                     |                              |                  |        |        |        |
| Benzene                 | 0.210            | 0.043   | -0.051  | 0.057   | 0.108            | 0.064    | 0.840  | 0.796   | 0.876  | 0.528        | 0.703        | 0.698     | 0.910         | 1.000   | 0.747                   | 0.946                   | 0.971        | 0.967    | 0.893           | 0.962    | 0.917   | 0.845             | 0.990   | 0.893              | 0.870  | 0.612       | 0.098            | 0.341                      | -0.070                       | 0.226            | 0.030  | 0.323    | 0.341  | -0.218       | 0.430        | -0.050   | 0.041         | -0.139  | 0.019                   | 0.067                   | 0.312        | 0.073    | 0.141           | 0.150    | 0.196   | 0.232             | 0.252   | 0.045              | 0.122    | -0.274      | 0.275            | 0.385                      | 0.428                        | 0.048            | -0.263 | -0.142 |        |
| 1,2,4-trimethyl-Benzene | 0.163            | 0.066   | 0.021   | 0.085   | 0.076            | 0.121    | 0.625  | 0.714   | 0.606  | 0.396        | 0.669        | 0.675     | 0.664         | 0.747   | 1.000                   | 0.779                   | 0.771        | 0.783    | 0.707           | 0.784    | 0.784   | 0.786             | 0.730   | 0.720              | 0.708  | 0.243       | 0.304            | -0.170                     | 0.012                        | -0.074           | 0.039  | 0.165    | -0.385 | 0.375        | -0.182       | -0.187   | -0.140        | 0.196   | 0.255                   | -0.035                  | 0.078        | 0.202    | 0.107           | 0.175    | 0.202   | 0.202             | 0.044   | 0.044              | -0.288   | 0.406       | 0.250            | 0.348                      | -0.174                       | -0.197           | -0.179 |        |        |
| 1,3,5-trimethyl-Benzene | 0.194            | 0.067   | -0.023  | 0.078   | 0.014            | 0.176    | 0.843  | 0.810   | 0.807  | 0.540        | 0.722        | 0.720     | 0.857         | 0.946   | 0.779                   | 1.000                   | 0.979        | 0.985    | 0.916           | 0.988    | 0.953   | 0.904             | 0.964   | 0.868              | 0.856  | 0.714       | 0.169            | 0.420                      | 0.247                        | 0.071            | 0.237  | 0.312    | -0.378 | 0.430        | -0.099       | -0.052   | -0.247        | -0.120  | 0.096                   | 0.314                   | -0.023       | 0.095    | 0.072           | 0.148    | 0.170   | 0.283             | -0.071  | 0.364              | 0.428    | 0.414       | -0.852           | -0.257                     | -0.220                       |                  |        |        |        |
| Ethylbenzene            | 0.222            | 0.059   | -0.046  | 0.072   | 0.049            | 0.130    | 0.874  | 0.837   | 0.860  | 0.620        | 0.756        | 0.758     | 0.909         | 0.971   | 0.771                   | 0.979                   | 1.000        | 0.988    | 0.916           | 0.990    | 0.971   | 0.858             | 0.985   | 0.871              | 0.870  | 0.689       | 0.149            | 0.428                      | -0.045                       | 0.228            | 0.036  | 0.311    | 0.353  | -0.311       | 0.458        | -0.079   | -0.013        | -0.218  | -0.097                  | 0.101                   | 0.281        | -0.009   | 0.065           | 0.068    | 0.127   | 0.193             | 0.213   | -0.062             | 0.052    | -0.335      | 0.352            | 0.414                      | 0.477                        | -0.011           | -0.241 | -0.151 |        |
| m-Xylene                | 0.188            | 0.107   | 0.026   | 0.119   | 0.023            | 0.122    | 0.844  | 0.820   | 0.834  | 0.546        | 0.720        | 0.716     | 0.876         | 0.967   | 0.783                   | 0.985                   | 0.988        | 1.000    | 0.918           | 0.994    | 0.941   | 0.806             | 0.979   | 0.900              | 0.894  | 0.689       | 0.177            | 0.391                      | -0.055                       | 0.240            | 0.074  | 0.254    | 0.324  | -0.353       | 0.445        | -0.108   | -0.046        | -0.231  | -0.082                  | 0.090                   | 0.341        | 0.001    | 0.136           | 0.102    | 0.182   | 0.180             | 0.312   | -0.045             | 0.116    | -0.221      | 0.336            | 0.404                      | 0.399                        | -0.051           | -0.227 | -0.179 |        |
| n-Propylbenzene         | 0.181            | 0.025   | -0.059  | 0.037   | -0.051           | 0.170    | 0.794  | 0.746   | 0.738  | 0.565        | 0.687        | 0.679     | 0.811         | 0.893   | 0.707                   | 0.916                   | 0.916        | 0.918    | 1.000           | 0.920    | 0.882   | 0.810             | 0.907   | 0.808              | 0.846  | 0.700       | 0.159            | 0.438                      | 0.002                        | 0.250            | 0.044  | 0.258    | 0.300  | -0.325       | 0.400        | -0.054   | -0.048        | -0.165  | -0.089                  | 0.067                   | 0.274        | -0.024   | 0.068           | 0.084    | 0.114   | 0.136             | 0.228   | -0.057             | 0.010    | -0.258      | 0.370            | 0.371                      | 0.402                        | -0.032           | -0.183 | -0.116 |        |
| o-Xylene                | 0.194            | 0.085   | -0.001  | 0.097   | 0.016            | 0.109    | 0.860  | 0.831   | 0.830  | 0.580        | 0.737        | 0.736     | 0.886         | 0.962   | 0.784                   | 0.988                   | 0.990        | 0.994    | 0.920           | 1.000    | 0.956   | 0.891             | 0.976   | 0.887              | 0.880  | 0.715       | 0.187            | 0.419                      | -0.024                       | 0.243            | 0.064  | 0.279    | 0.349  | -0.339       | 0.441        | -0.105   | -0.053        | -0.229  | -0.105                  | 0.102                   | 0.309        | -0.024   | 0.099           | 0.079    | 0.151   | 0.164             | 0.268   | -0.067             | 0.089    | -0.320      | 0.377            | 0.427                      | 0.429                        | -0.029           | -0.222 | -0.158 |        |
| Styrene                 | 0.280            | 0.021   | -0.114  | 0.037   | 0.058            | 0.166    | 0.853  | 0.809   | 0.808  | 0.653        | 0.809        | 0.818     | 0.859         | 0.917   | 0.786                   | 0.953                   | 0.971        | 0.941    | 0.812           | 0.956    | 1.000   | 0.802             | 0.940   | 0.793              | 0.801  | 0.729       | 0.149            | 0.450                      | -0.077                       | 0.160            | -0.012 |          |        |              |              |          |               |         |                         |                         |              |          |                 |          |         |                   |         |                    |          |             |                  |                            |                              |                  |        |        |        |
